# Supplementary material for: Relevance of prediction scores derived from the SARS-CoV-2 first wave, in the UK COVID-19 second wave, for early discharge, severity and mortality: a PREDICT COVID UK prospective observational cohort study
Source: bioRxiv or medRxiv preprint supplement (doi:10.1101/2021.06.09.21258602), 2021-06-09
Supplement: Supplementary file [file media-2.pdf]

## INITIAL ASSESSMENT

Date/Time of assessment: \_\_\_\_/\_\_\_\_/\_\_\_\_ \_\_\_\_:\_\_\_\_

Name of clinician: \_\_\_\_\_

Covid-like symptoms (Fever, myalgia, persistent cough, dyspnea, change/loss of smell or taste)

**NO** → Step down from Covid zone after discussion with senior

**YES**

1. Send Covid-19 PCR Swab
2. Send Flu swab
3. Calculate SOARS score →

**SOARS Score (Please circle)**

SpO<sub>2</sub>: <92% (1 point)  
 Obesity: Yes (1 point)  
 Age: 50-59 (1 point)  
 60-69 (2 points)  
 70-79 (3 points)  
 >80 (4 points)  
 RR: >24 (1 point)  
 Stroke: History (1 point)

**Total: SOARS = \_\_\_\_\_**

0-1

2

3 OR ABOVE

**GREEN**

**SOARS SCORE 0-1**

- 1) Discharge to Virtual Hospital\*\*
- 2) Give patient Advice Pack (with oximeter)

\*\*Make referral via Infloflex Web COVID 19 or email [westherts.respcovid19@nhs.net](mailto:westherts.respcovid19@nhs.net) if Infloflex unavailable

**ORANGE**

**SOARS SCORE 2**

Is the patient High Risk? (Check high risk criteria)

Complete treatment in GREEN BOX ← NO

YES ↓

- 1) ADMIT UNDER MEDICS
- 2) Send bloods (Set 1)
- 3) Book Chest X-Ray
- 4) Calculate COVID LONG SCORE

**If CLS <7**

- 5) Assess oxygen requirements
- 6) Prone if <94% Room Air
- 7) Aim for ≥94% (unless COPD or known Type II RF)

**If CLS ≥7**

- 5) Complete treatment in RED BOX

**RED**

**SOARS SCORE ≥ 3**  
or  
**COVID LONG SCORE ≥ 7**

- 1) ADMIT UNDER MEDICS
- 2) Send bloods (Set 1 and 2)
- 3) Book Chest X-Ray
- 4) IV fluids if indicated
- 5) Antibiotics if PCT >0.5 (refer to Microguide)
- 6) Aim for ≥94% (unless COPD or known Type II RF)
- 7) Calculate Rockwood Score (CFS)
- 8) Access DNAPCR and TEP

**HIGH RISK CRITERIA**

Age: <50 years  
**AND**  
 R/R: >24  
 SPO<sub>2</sub>: <92% RA  
 NEWS: >2

**COVID LONG SCORE (Please circle)**

Ever smoker: Yes (1 point)  
 Dementia: Yes (1 point)  
 CKD: Stage 1 (1 point)  
 Stage 2 (2 points)  
 Stage 3 (3 points)  
 Stage 4 (4 points)  
 Stage 5 (5 points)  
 WCC: >11 (1 point)  
 Lymph: <0.7 (1 point)  
 CXR: >4 zones (1 point)

**Total: SOARS + CLS = \_\_\_\_\_**

**Bloods:**  
 (Set 1) FBC; U/Es; CRP; LFT  
 (Set 2) Ferritin; D-Dimer; Procalcitonin; BNP; LDH; Troponin

| SOARS score mortality |      |      |       |       |       |       |       |        |
|-----------------------|------|------|-------|-------|-------|-------|-------|--------|
| 0                     | 1    | 2    | 3     | 4     | 5     | 6     | 7     | 8      |
| 1.4%                  | 5.3% | 5.9% | 23.4% | 35.4% | 53.9% | 72.5% | 78.6% | >78.6% |

# INPATIENT MANAGEMENT

Time/Date of initial treatment: \_\_\_\_/\_\_\_\_/\_\_\_\_ :\_\_\_\_ Name of clinician: \_\_\_\_\_

## 1. INITIAL TREATMENT

If RA SpO<sub>2</sub><92% (unless COPD/OHS/CCF)

- ➔ Give supplemental oxygen – target Sats up to 94%
- ➔ Prone if needed
- ➔ Anticoagulation as per risk of VTE: Therapeutic/Prophylactic (see Anticoagulation and Thromboprophylaxis policy). CTPA to be considered after consultant/respiratory review
- ➔ Perform PCT and **STOP** antibiotics if below 0.25 mcg/L (Refer to MicroGuide)
  1. Send sputum sample and blood cultures
  2. Choice of antibiotics based on hospital guidelines (community acquired pneumonia; hospital acquired pneumonia; sepsis)
  3. Total duration of antibiotics - 5 days
- ➔ Treat other comorbidities
- ➔ Prescribe Covid medications if indicated (see medications on page 4)

## 2. CALCULATE CLINICAL FRAILTY SCORE (CFS) (PLEASE CIRCLE)

Your assessment should be based on the patient's functional status TWO WEEKS prior to hospitalisation

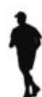

**1 Very Fit** – People who are robust, active, energetic and motivated. These people commonly exercise regularly. They are among the fittest for their age.

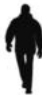

**2 Well** – People who have **no active disease symptoms** but are less fit than category 1. Often, they exercise or are very **active occasionally**, e.g. seasonally.

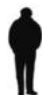

**3 Managing Well** – People whose **medical problems are well controlled**, but are **not regularly active** beyond routine walking.

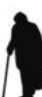

**4 Vulnerable** – While **not dependent** on others for daily help, often **symptoms limit activities**. A common complaint is being "slowed up", and/or being tired during the day.

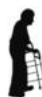

**5 Mildly Frail** – These people often have **more evident slowing**, and need help in **high order IADLs** (finances, transportation, heavy housework, medications). Typically, mild frailty progressively impairs shopping and walking outside alone, meal preparation and housework.

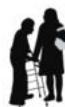

**6 Moderately Frail** – People need help with **all outside activities** and with **keeping house**. Inside, they often have problems with stairs and need **help with bathing** and might need minimal assistance (cuing, standby) with dressing.

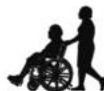

**7 Severely Frail** – **Completely dependent for personal care**, from whatever cause (physical or cognitive). Even so, they seem stable and not at high risk of dying (within ~ 6 months).

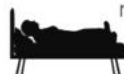

**8 Very Severely Frail** – Completely dependent, approaching the end of life. Typically, they could not recover even from a minor illness.

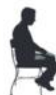

**9. Terminally Ill** - Approaching the end of life. This category applies to people with a **life expectancy <6 months**, who are **not otherwise evidently frail**.

## 3. MAKE ESCALATION DECISION AND DNACPR IF APPROPRIATE

|                                              |                                                                                                                          |
|----------------------------------------------|--------------------------------------------------------------------------------------------------------------------------|
| Please tick Escalation Decision chosen       | Please tick Escalation Decision chosen                                                                                   |
| <b>If CFS &lt;5</b> <input type="checkbox"/> | <b>If CFS ≥5</b> <input type="checkbox"/>                                                                                |
| <b>➔ <u>FULL ESCALATION</u></b>              | <b>➔ <u>WARD BASED CEILING OF CARE</u></b>                                                                               |
|                                              | <input type="radio"/> Complete TEP with senior clinician<br><input type="radio"/> <b>Patients are not for ICU or NIV</b> |

# FULL ESCALATION

- **If SpO<sub>2</sub> < 94% on FiO<sub>2</sub> of 0.6**  
 or CPAP > 10cmH<sub>2</sub>O  
 or PF ratio < 100 (PF ratio = arterial PaO<sub>2</sub> / FiO<sub>2</sub>)  
 or worsening at 24h/daily review  
 → **Rapid assessment for intubation & transfer to ITU if appropriate**
- **If SpO<sub>2</sub> < 94% on FiO<sub>2</sub> of 0.4**  
 → **Discuss with Respiratory Consultant (available 24hours)** if candidate for NIV and recruitment into Recovery Respiratory Support as shown here:

| <b><u>Recovery Respiratory Support</u></b>                                                                |                                                                                                                                                                                       |                              |
|-----------------------------------------------------------------------------------------------------------|---------------------------------------------------------------------------------------------------------------------------------------------------------------------------------------|------------------------------|
| <b>HIGH FLOW NASAL OXYGEN (HFNO)</b>                                                                      | <b>CONTINUOUS POSITIVE AIRWAY PRESSURE (CPAP)</b>                                                                                                                                     | <b>STANDARD CARE</b>         |
| Start at 60L/min flow @ FiO <sub>2</sub> 0.6                                                              | Start at 8 cmH <sub>2</sub> O @ FiO <sub>2</sub> 0.5                                                                                                                                  | Based on clinical assessment |
| Up titrate by increasing FiO <sub>2</sub>                                                                 | Up titrate by increasing pressure by 2 or increasing FiO <sub>2</sub>                                                                                                                 |                              |
| <i>Weaning</i><br>Trial on Venturi face mask, if fails, back to HFNC                                      | <i>Weaning</i><br>If FiO <sub>2</sub> < 0.5 swap to A40 in CPAP mode with entrained O <sub>2</sub> to wean<br>Match settings when swapped over<br>Respiratory team review in one hour |                              |
| Assess daily clinical review; PF ratio; ABG; if deteriorating, discuss with Respiratory Consultant or ITU |                                                                                                                                                                                       |                              |

- **If SpO<sub>2</sub> > 94% on FiO<sub>2</sub> of 0.4**  
 → **Standard care in the ward**

## WARD BASED CEILING OF CARE

- Always titrate treatment to maintain SpO<sub>2</sub> up to 94% (unless COPD/OHS/CCF where target is 88-92%)
- Therapeutic anticoagulation in ill patients with high suspicion for PE/DVT

### **Not reaching SpO<sub>2</sub> up to 94% on FiO<sub>2</sub> of 0.4?**

- Discuss with Respiratory Consultant in consideration of HFNO: Start at 60L/min flow @ FiO<sub>2</sub> 0.6 or CPAP (8 cmH<sub>2</sub>O @ FiO<sub>2</sub> 0.5)

### **If PF ratio < 100 or declining oxygenation or high risk score**

- Timely discussion with family to enable palliative support

# MEDICATIONS – ACTIVE TREATMENT

For more information about Covid-19 medications, contact Medicines Information.

| DEXAMETHASONE                                                                                                                                                                                                                                                                                                             |                                                                                                                                                                                                                                                                                                                                                                                                                                                                                                                                                                                                                                                                                                                                                                                                                                                                      |
|---------------------------------------------------------------------------------------------------------------------------------------------------------------------------------------------------------------------------------------------------------------------------------------------------------------------------|----------------------------------------------------------------------------------------------------------------------------------------------------------------------------------------------------------------------------------------------------------------------------------------------------------------------------------------------------------------------------------------------------------------------------------------------------------------------------------------------------------------------------------------------------------------------------------------------------------------------------------------------------------------------------------------------------------------------------------------------------------------------------------------------------------------------------------------------------------------------|
| <b>Indication</b>                                                                                                                                                                                                                                                                                                         | <b>Treatment of Covid-19 on supplemental oxygen</b>                                                                                                                                                                                                                                                                                                                                                                                                                                                                                                                                                                                                                                                                                                                                                                                                                  |
| <b>Dose</b>                                                                                                                                                                                                                                                                                                               | <ul style="list-style-type: none"> <li>• 6mg dexamethasone orally or 6.6mg dexamethasone IV, once a day, 7-10 days</li> <li>• If on IV, switch to oral dexamethasone as soon as possible</li> <li>• Dexamethasone should be stopped on discharge unless patient is hypoxic or still symptomatic and not at baseline, in which case the treatment course should be completed post discharge</li> <li>• When prescribing dexamethasone consideration needs to be given to the gastric ulcer protection effect of proton pump inhibitors according to local hospital policy</li> </ul>                                                                                                                                                                                                                                                                                  |
| <b>The following medications have inconclusive evidence – and should only be used with Resp/ITU/Micro Consultant recommendation</b>                                                                                                                                                                                       |                                                                                                                                                                                                                                                                                                                                                                                                                                                                                                                                                                                                                                                                                                                                                                                                                                                                      |
| REMDESIVIR                                                                                                                                                                                                                                                                                                                | TOCILIZUMAB (discuss with Resp./ITU consultant)                                                                                                                                                                                                                                                                                                                                                                                                                                                                                                                                                                                                                                                                                                                                                                                                                      |
| <b>Indication</b> <ul style="list-style-type: none"> <li>• Covid-19 confirmed, within acute viremic phase (after 7 days of symptom start)</li> <li>• Lymphopenic</li> <li>• Need for oxygenation but not requiring mechanical ventilation</li> <li>• Ensure eGFR &gt;30; body weight &gt;40kg, and ALT &lt;200</li> </ul> | <ul style="list-style-type: none"> <li>• High dose methylprednisolone sparing agent targeting cytokine storm in <b>critically ill confirmed COVID-19</b> patients at presentation with fever &gt;38 and Type 1 Respiratory failure due to pneumonia.</li> <li>• And ONE or more of the following high-severity markers:               <ul style="list-style-type: none"> <li>○ CRP &gt;50/Ferritin &gt;500<math>\mu</math>g/L / D-dimer &gt;1000mg/ml / LDH &gt;250U/L</li> </ul> </li> </ul> <b>Exclusions:</b> <ul style="list-style-type: none"> <li>○ Known hypersensitivity to Tocilizumab</li> <li>○ Co-existing infection which may be worsened by Tocilizumab</li> <li>○ More than 24hrs on respiratory support</li> <li>○ Evidence of immunosuppression</li> <li>○ Platelets &lt;50x10<sup>9</sup>/L, ALT &gt;200, Neut. &lt;2 x10<sup>9</sup>/L</li> </ul> |
| Day 1 – single loading dose of Remdesivir 200 mg given by intravenous infusion<br>Day 2 onwards – 100 mg given once daily by IV infusion.<br><b>The total duration of treatment should be 5 days</b><br>Stop treatment if patient not on oxygen or discharged                                                             |                                                                                                                                                                                                                                                                                                                                                                                                                                                                                                                                                                                                                                                                                                                                                                                                                                                                      |
| <b>Dose</b>                                                                                                                                                                                                                                                                                                               | <ul style="list-style-type: none"> <li>• 8mg/kg (up to a max. of 100kg) by IV</li> <li>• Should be diluted in 100mL bag of 0.9% Sodium Chloride after removing equivalent volume of 0.9% Sodium Chloride and given over 1 hour</li> <li>• A single dose to be administered with option to repeat dose in 12-24 hours if initial dose has not caused sufficient improvement</li> </ul>                                                                                                                                                                                                                                                                                                                                                                                                                                                                                |

# MEDICATIONS – PALLIATIVE CARE

| Indication                     | Drug                                                                         | PRN S/C Dose                                     | Syringe Driver (CSCI) over 24 hours |
|--------------------------------|------------------------------------------------------------------------------|--------------------------------------------------|-------------------------------------|
| Pain/Cough                     | Morphine Sulphate (half dose in elderly patients. If eGFR <30 use oxycodone) | 2.5-5mg 2-4 hourly                               | 10-20mg                             |
| Breathlessness                 | Midazolam + Morphine sulphate (as above)                                     | 2.5-5mg 2-4 hourly                               | 10mg                                |
| Delirium                       | Haloperidol (half dose in elderly)                                           | 1-5mg in 1-3 divided doses over 24h, max 5mg/day | N/A                                 |
| Delirium <i>if end of life</i> | Levomopromazine                                                              | 25mg                                             | 50mg                                |
|                                | Midazolam                                                                    | 5mg 2-4 hourly                                   | 15mg                                |
| Nausea and Vomiting            | Cyclizine                                                                    | 25mg 8 hourly                                    | 100-150mg                           |
| Seizures                       | Midazolam                                                                    | 5-10mg 2-4 hourly                                | 30-60mg                             |
| Respiratory secretions         | Glycopyrronium                                                               | 0.2-0.4mg 4 hourly                               | 1.2-2.4mg                           |

If symptoms are not adequately controlled, please contact the palliative care team on 01923 217930 or bleep 1006

Version date: 29/01/2021 // Review date: 18/12/2021 // Version no: 5.1 // Print Code: CovPath5.1

Authors: R. Vancheeswaran, A. Navarra, S. Khan, N. Nordin, R. Mogal, A. Jayarathnam, A. Barlow., CPG Prog.

Page 4 of 4
